# Supplementary material for: Human antigen R-regulated mRNA metabolism promotes the cell motility of migrating mouse neurons
Source: Oxford University Press journal article supplement (doi:10.1242/dev.183509), 2020-02-25
Supplement: dev183509supp.pdf [file dev183509supp.pdf]

## Supplementary Materials

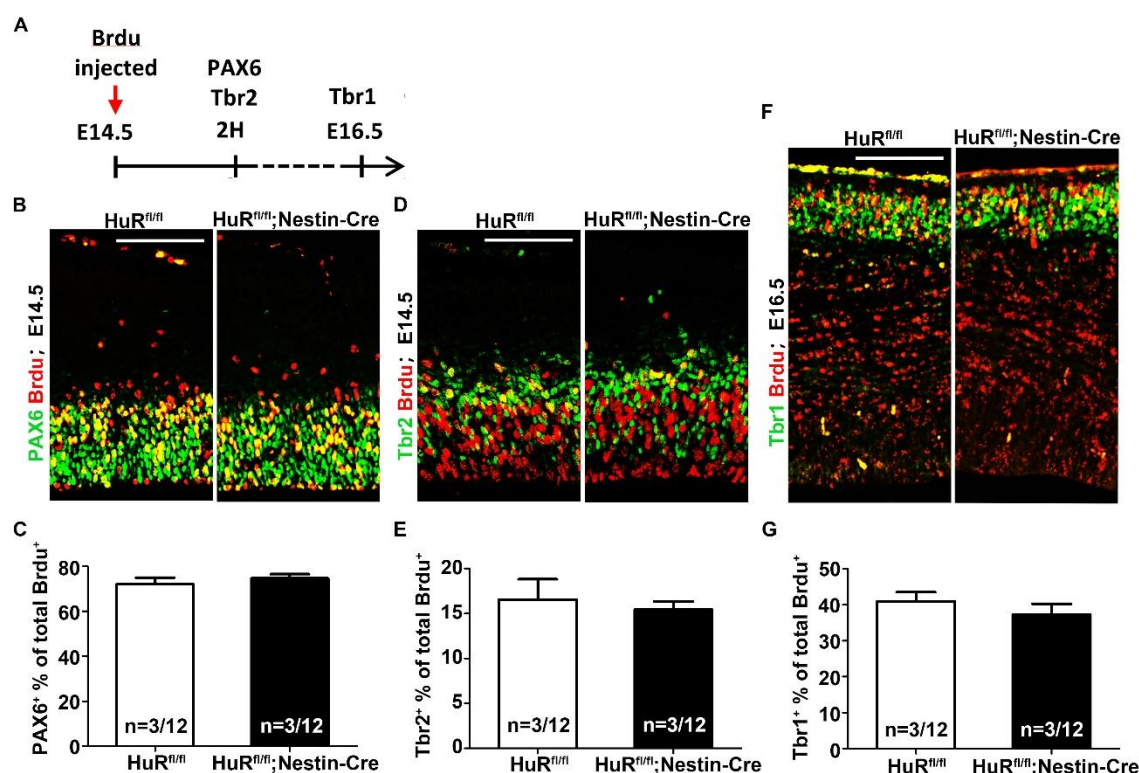

**Fig. S1. HuR deletion did not affect neural progenitor cell proliferation or differentiation.** (A) Schematic of BrdU labeling assay. (B) BrdU was administrated at E14.5  $HuR^{fl/fl}; Nestin-Cre$  mice and  $HuR^{fl/fl}$  mice. Brain sections were stained with anti-PAX6 and anti-BrdU antibodies in 2 h post BrdU injection. (C) The ratio of PAX6<sup>+</sup> BrdU<sup>+</sup> among the total BrdU<sup>+</sup> cells was similar between two mice groups. Student's t-test was used for statistical analysis. The n values represent the numbers of brains/brain sections. (D) BrdU was administrated at E14.5  $HuR^{fl/fl}; Nestin-Cre$  mice and  $HuR^{fl/fl}$  mice. Brain sections were stained with anti-Tbr2 and anti-BrdU antibodies in 2 h post BrdU injection. (E) The ratio of Tbr2<sup>+</sup> BrdU<sup>+</sup> among the total BrdU<sup>+</sup> cells was similar between two mice groups. Student's t-test was used for statistical analysis. The n values represent the numbers of brains/brain sections. (F) BrdU was administrated at E14.5  $HuR^{fl/fl}; Nestin-Cre$  mice and  $HuR^{fl/fl}$  mice. Brain sections were stained with anti-Tbr1 and anti-BrdU antibodies in 2 h post BrdU injection. (G) The ratio of Tbr1<sup>+</sup> BrdU<sup>+</sup>

among the total BrdU<sup>+</sup> cells was similar between two mice groups. Student's t-test was used for statistical analysis. The n values represent the numbers of brains/brain sections. The data are shown as means  $\pm$  SEM. n.s.:  $P > 0.05$ ; \*:  $P < 0.05$ ; \*\*:  $P < 0.01$ ; \*\*\*:  $P < 0.001$ .

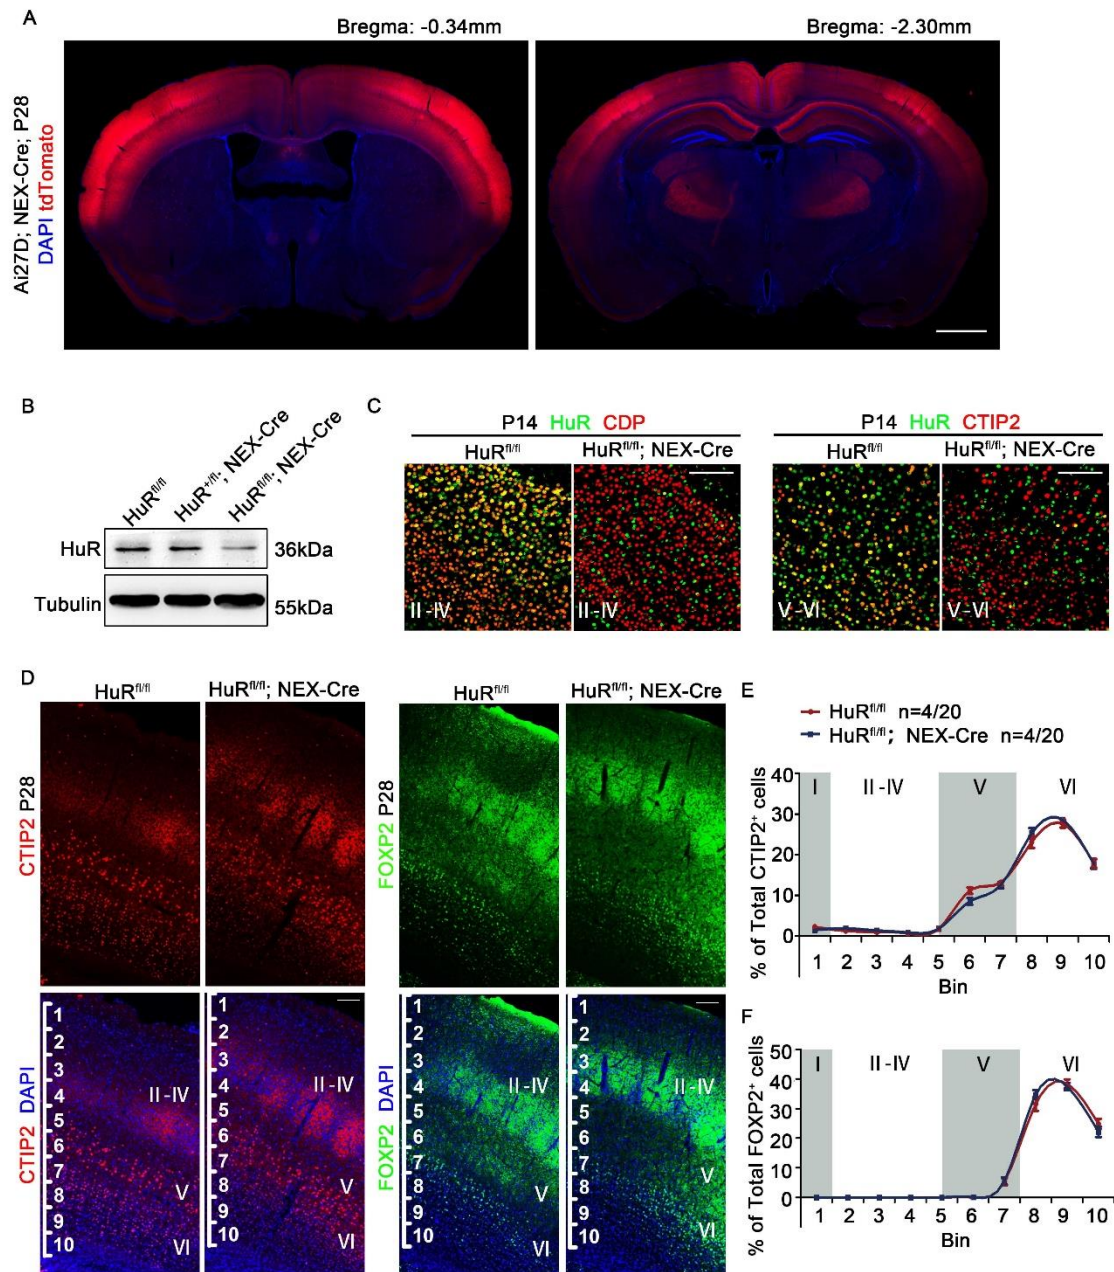

**Fig. S2.** Deletion of HuR in post-mitotic neurons affects cortical lamination.

(A) Representative images of P28 Ai27D; NEX-Cre cortical sections. The tdTomato signal was present in the cortex and hippocampus. (B) Western blotting analyses of HuR protein expression in P0 HuR<sup>fl/fl</sup>, HuR<sup>+/fl</sup>; NEX-Cre; and HuR<sup>fl/fl</sup>; NEX-Cre

cortical lysates. (C) Immunostaining of CDP, CTIP2 and HuR in P14  $\text{HuR}^{\text{fl/fl}}$  and  $\text{HuR}^{\text{fl/fl}}$ ; NEX-Cre cortical sections. HuR was absent from  $\text{CDP}^+$  and  $\text{CTIP2}^+$  cells. Scale bar=100  $\mu\text{m}$  (D) Immunostaining of CTIP2 and FOXP2 in P28  $\text{HuR}^{\text{fl/fl}}$  and  $\text{HuR}^{\text{fl/fl}}$ ; NEX-Cre cortical sections. Scale bar=100  $\mu\text{m}$ . (E) Distribution of  $\text{CTIP2}^+$  neurons in the cortex. Cerebral cortices were divided into 10 equal bins. Two-way ANOVA with *Bonferroni* post-hoc analysis was used for statistical analysis. The n values represent the numbers of brains/brain sections. (F) Distribution of  $\text{FOXP2}^+$  neurons in the cortex. Cerebral cortices were divided into 10 equal bins. Two-way ANOVA with *Bonferroni* post-hoc analysis was used for statistical analysis. The n values represent the numbers of brains/brain sections. For all images in this figure, nuclei were counterstained with DAPI. The data are shown as means  $\pm$  SEM. n.s.:  $P > 0.5$ ; \*:  $P < 0.05$ ; \*\*:  $P < 0.01$ ; \*\*\*:  $P < 0.001$ .

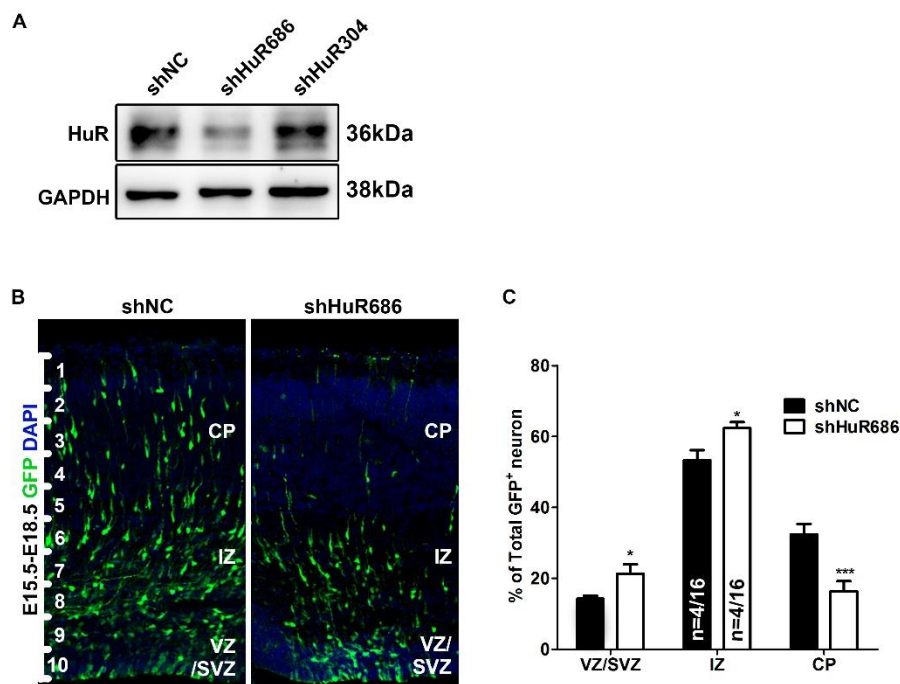

**Fig. S3. HuR knockdown impairs neuronal migration.** (A) Western blotting analysis showed the knockdown efficiency of shHuR686 was better than that of shHuR304. (B) E15.5 WT embryonic brains were electroporated with indicated plasmids, and cortical slices were stained with an anti-GFP antibody and DAPI at E18.5. Scale bar=100  $\mu\text{m}$ . (C) Cerebral cortices were divided into VZ/SVZ, IZ and



CP areas. Quantification analyses of GFP<sup>+</sup> cells in each area. Student's t-test was used for statistical analysis. The n values represent the numbers of brains/brain sections. The data are shown as means  $\pm$  SEM. n.s.:  $P > 0.5$ ; \*:  $P < 0.05$ ; \*\*:  $P < 0.01$ ; \*\*\*:  $P < 0.001$ .

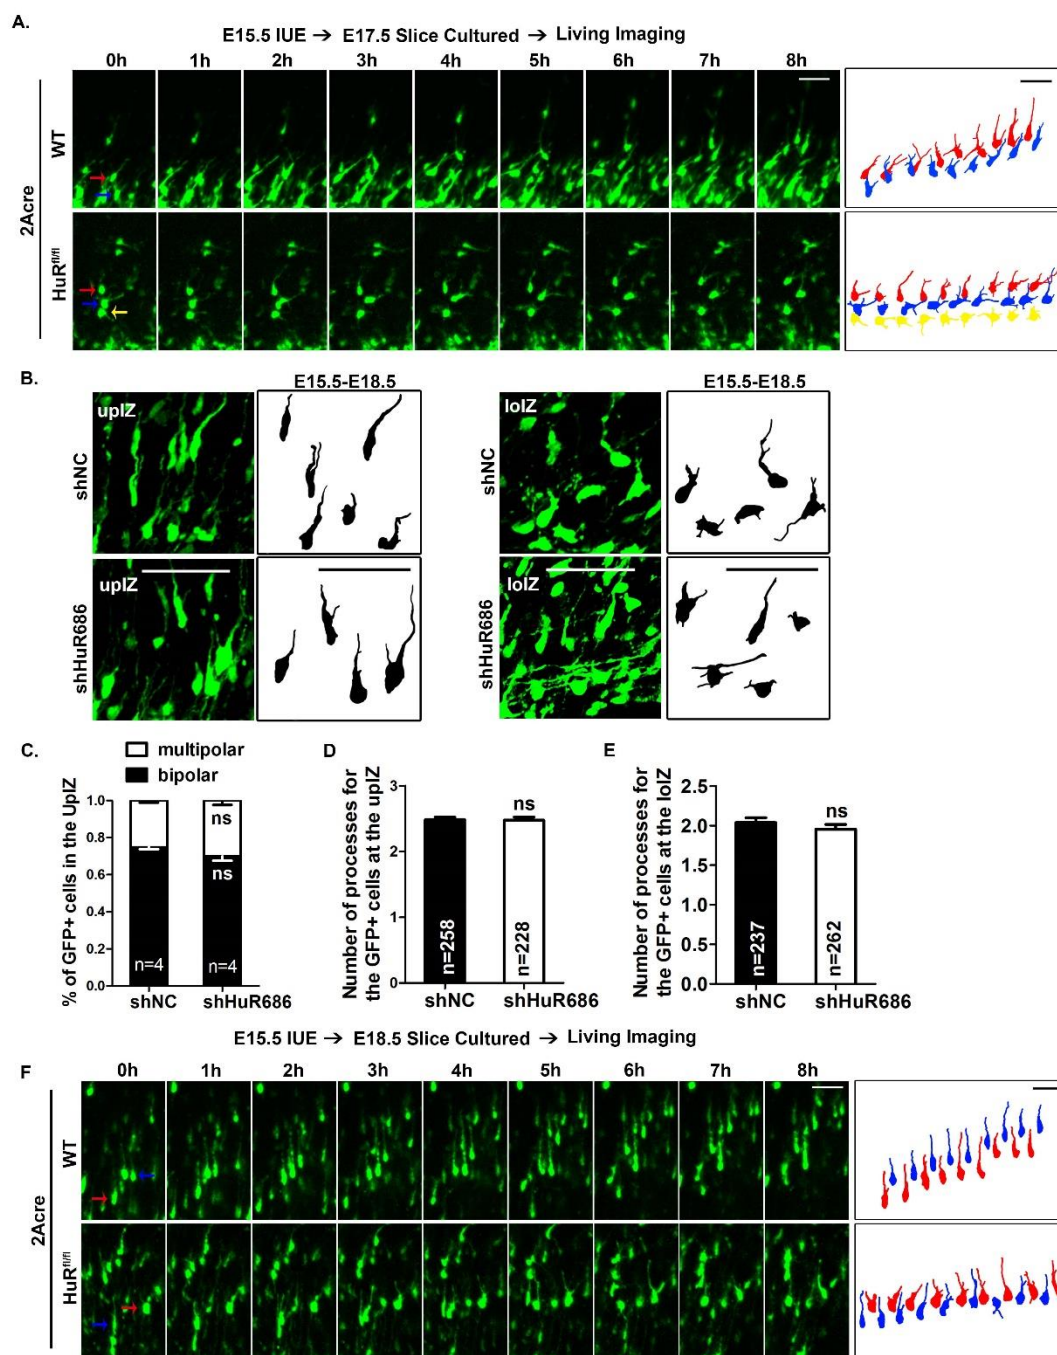

**Fig. S4. HuR-deficient neuron exhibits impaired cell motility but normal morphology.** (A) Brain slices were obtained 2 days after *in utero* electroporation of

GFP-2A-Cre plasmids into E15.5 HuR<sup>fl/fl</sup> or WT embryos. An 8-h time-lapse imaging assay was performed for each slice to acquire serial images of migrating neurons in the IZ. Representative neurons are indicated by red, blue and yellow arrows, and tracings of each neuron are shown in the right panels. Scale bars=20  $\mu$ m. (B) Representative images of GFP<sup>+</sup> neuron in the upIZ and loIZ of brains that were electroporated with indicated plasmids. Scale bars=20  $\mu$ m. (C) Quantification of multipolar and bipolar neurons in the upIZ of brains that electroporated with indicated plasmids. Student's t-test was used for statistical analysis. The n values represent the numbers of brains. (D) and (E) Quantification of processes of GFP<sup>+</sup> cells in the upIZ and loIZ. Student's t-test was used for statistical analysis. The n values represent the numbers of neurons. (F) Brain slices were obtained 3 days after *in utero* electroporation of RV-CAG-GFP-2A-Cre plasmids into E15.5 HuR<sup>fl/fl</sup> or WT embryos. An 8-h time-lapse imaging assay was performed for each slice to acquire serial images of migrating neurons in the CP. Representative neurons are indicated by red and blue arrows, and tracings of each neuron are shown in the right panels. Scale bars= 20  $\mu$ m. The numbers of brains and neurons quantified in each experiment are indicated on the graphs or shown in the legend. The data are shown as means  $\pm$  SEM. Student's t-test was used for statistical analyses in this figure. n.s.:  $P > 0.5$ ; \*:  $P < 0.05$ ; \*\*:  $P < 0.01$ ; \*\*\*:  $P < 0.001$ .

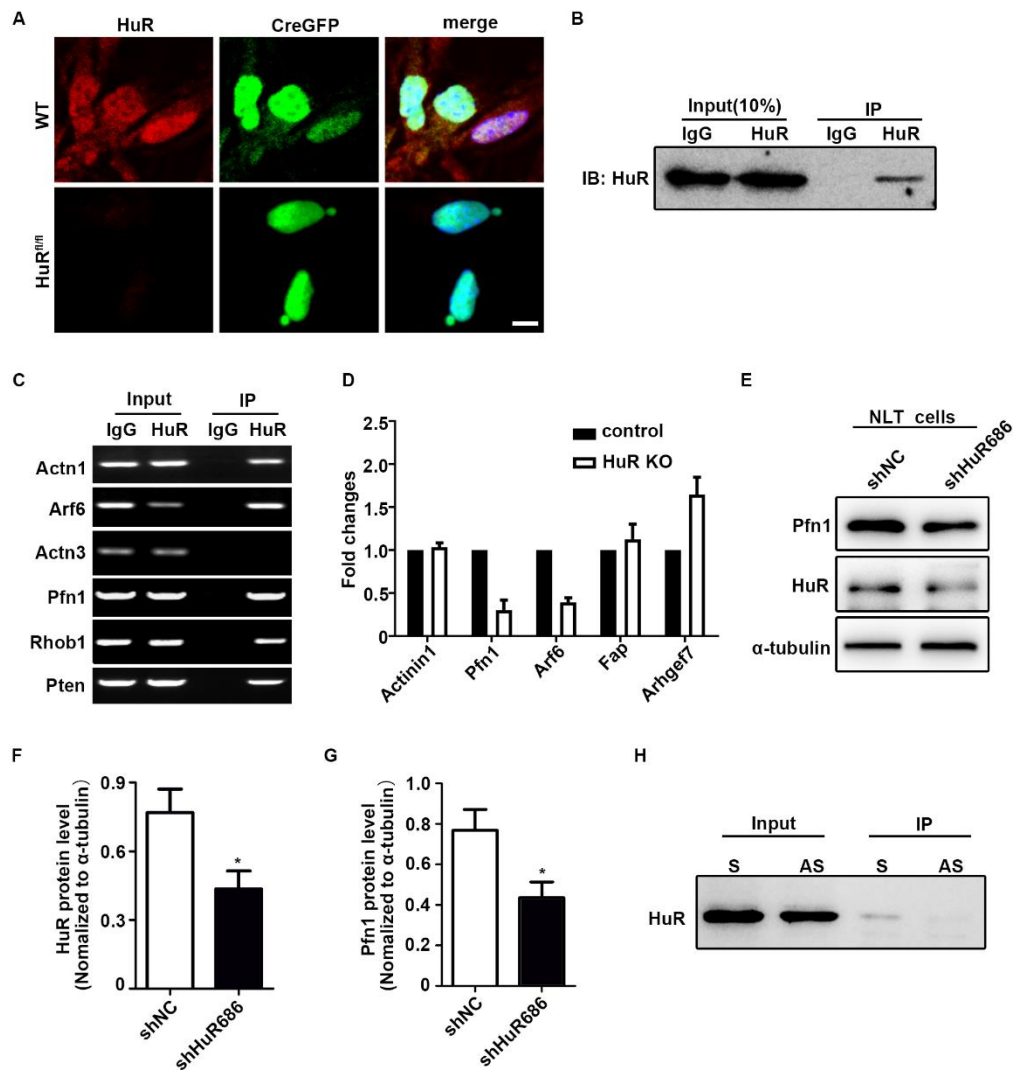

**Fig. S5. HuR deficiency impairs Pfn1 expression.** (A) Representative images of GFP-Cre lentivirus-infected *HuR<sup>fl/fl</sup>* and WT neurons. The absence of HuR staining signal confirmed the deletion of HuR in neurons. (B) RNA-IP using an anti-HuR antibody. (C) RNA-IP of HuR confirmed the binding between HuR protein and the mRNAs of *actn1*, *arf6*, *pfn1*, *rhob1* and *pten*. (D) qPCR analyses of indicated genes that derived from P0 *HuR<sup>fl/fl</sup>*; Nestin-Cre and *HuR<sup>fl/fl</sup>* mice cortical lysates. Mann-Whitney U was used for statistical analysis. Quantification results were from 4 independent experiments. (E) Western blotting analyses of HuR and Pfn1 protein expression in NLT cells that electroporated with shNC or shHuR686 vectors. (F) and (G) Quantitative analyses of HuR (F) and Pfn1 (G) protein expression levels in (E). Quantification results were from

3 independent experiments. Mann-Whitney U was used for statistical analysis. (H) RNA binding assay of *pfn1* mRNA with HuR protein. The sense RNA template of *pfn1* precipitates with HuR protein. Quantification data are shown as means  $\pm$  SEM. n.s.:  $P > 0.5$ ; \*:  $P < 0.05$ ; \*\*:  $P < 0.01$ ; \*\*\*:  $P < 0.001$ .

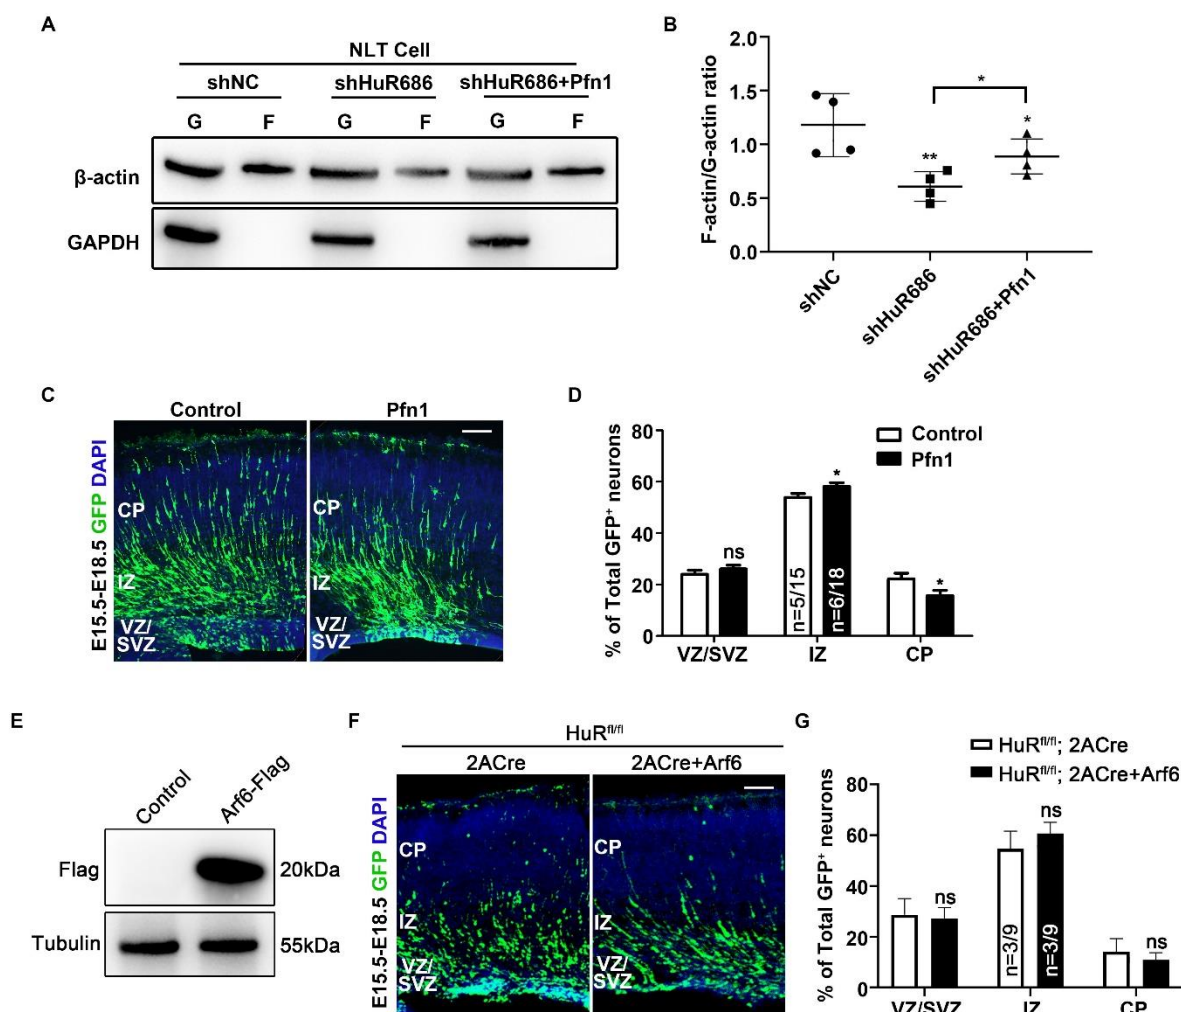

**Fig. S6. Pfn1 overexpression rescues migration defects of HuR-deficient neurons.**

(A) Western blotting analyses of G-actin and F-actin fractions in cultured NLT cells that transfected with indicated plasmid. The mole ratio of shHuR vector to Pfn1 expression vector is 2:1. (B) Quantification of G/F-actin ratio as determined using densitometry analyses of Western blotting results from 4 independent experiments. One-way ANOVA was used for statistical analysis. (C) The control or Pfn1 expression plasmid was electroporated into E15.5 WT embryo cortices. Cortical sections were

analyzed at E18.5 and immunostained for GFP. The nuclei were counterstained with DAPI. Scale bar=100  $\mu$ m. (D) Quantification results of GFP<sup>+</sup> neuron distribution across the cerebral cortex. Overexpression Pfn1 alone showed a deleterious effect on neuronal migration. Student's t-test was used for statistical analysis. The n values represent the numbers of brains/brain sections. (E) HEK293T cells were transfected with indicated plasmids. Cell lysates were incubated with an anti-Flag antibody to detect the overexpression of Arf6.  $\beta$ -Tubulin was used as a loading control. (F) E15.5 HuR<sup>fl/fl</sup> embryonic brains were electroporated with the indicated plasmids, and cortical slices were stained with an anti-GFP antibody and DAPI at E18.5. The mole ratio of 2A-Cre vector to Arf6 expression vector is 1:1. Scale bar=100  $\mu$ m. (G) Quantification analyses of GFP<sup>+</sup> neuron distribution in (F). Student's t-test was used for statistical analysis. The n values represent the numbers of brains/brain sections. The data are shown as means  $\pm$  SEM. n.s.: P > 0.5; \*: P < 0.05; \*\*: P < 0.01; \*\*\*: P < 0.001.



**Table S1 Results of PCR-array**

| Position | Unigene   | GeneBank  | Description    | Gene Name                                                             | Fold of Change | Comment |
|----------|-----------|-----------|----------------|-----------------------------------------------------------------------|----------------|---------|
| A01      | Mm.489605 | NM_026064 | <i>Myl12a</i>  | RIKEN cDNA<br>2900073G15 gene                                         | -1.92          |         |
| A02      | Mm.403477 | NM_134156 | <i>Actn1</i>   | Actinin, alpha 1                                                      | -5.84          | #       |
| A03      | Mm.5316   | NM_013456 | <i>Actn3</i>   | Actinin alpha 3                                                       | -2.38          | #       |
| A04      | Mm.81144  | NM_021895 | <i>Actn4</i>   | Actinin alpha 4                                                       | -1.21          |         |
| A05      | Mm.259045 | NM_146243 | <i>Actr2</i>   | ARP2 actin-related<br>protein 2 homolog<br>(yeast)                    | -1.46          |         |
| A06      | Mm.183102 | NM_023735 | <i>Actr3</i>   | ARP3 actin-related<br>protein 3 homolog<br>(yeast)                    | -1.37          |         |
| A07      | Mm.6645   | NM_009652 | <i>Akt1</i>    | Thymoma viral<br>proto-oncogene 1                                     | 1.31           |         |
| A08      | Mm.27308  | NM_007481 | <i>Arf6</i>    | ADP-ribosylation<br>factor 6                                          | -3.52          |         |
| A09      | Mm.474783 | NM_133796 | <i>Arhgdia</i> | Rho GDP<br>dissociation inhibitor<br>(GDI) alpha                      | -1.55          |         |
| A10      | Mm.244068 | NM_017402 | <i>Arhgef7</i> | Rho guanine<br>nucleotide exchange<br>factor (GEF7)                   | 3.04           | #       |
| A11      | Mm.197534 | NM_130862 | <i>Baiap2</i>  | Brain-specific<br>angiogenesis<br>inhibitor 1-associated<br>protein 2 | -2.22          |         |
| A12      | Mm.3758   | NM_009954 | <i>Bcar1</i>   | Breast cancer anti-                                                   | -1.59          |         |

| estrogen resistance 1  |           |           |              |                                   |       |   |
|------------------------|-----------|-----------|--------------|-----------------------------------|-------|---|
| B01                    | Mm.6221   | NM_007600 | <i>Capn1</i> | Calpain 1                         | -2.45 | # |
| B02                    | Mm.19306  | NM_009794 | <i>Capn2</i> | Calpain 2                         | -2.00 |   |
| B03                    | Mm.28278  | NM_007616 | <i>Cav1</i>  | Caveolin 1, caveolae protein      | -2.24 |   |
| Cell division cycle 42 |           |           |              |                                   |       |   |
| B04                    | Mm.447553 | NM_009861 | <i>Cdc42</i> | homolog (S. cerevisiae)           | -2.17 |   |
| B05                    | Mm.329655 | NM_007687 | <i>Cfl1</i>  | Cofilin 1, non-muscle             | -2.06 |   |
| V-crk sarcoma virus    |           |           |              |                                   |       |   |
| B06                    | Mm.280125 | NM_133656 | <i>Crk</i>   | CT10 oncogene homolog (avian)     | -1.74 |   |
| Colony stimulating     |           |           |              |                                   |       |   |
| B07                    | Mm.795    | NM_007778 | <i>Csf1</i>  | factor 1 (macrophage)             | -1.87 | # |
| B08                    | Mm.490123 | NM_007803 | <i>Ctnn</i>  | Cortactin                         | -1.99 | # |
| B09                    | Mm.195916 | NM_007858 | <i>Diap1</i> | Diaphanous homolog 1 (Drosophila) | -2.26 | # |
| B10                    | Mm.1151   | NM_010074 | <i>Dpp4</i>  | Dipeptidylpeptidase 4             | -2.04 | # |
| B11                    | Mm.252481 | NM_010113 | <i>Egf</i>   | Epidermal growth factor           | -1.89 | # |
| B12                    | Mm.420648 | NM_007912 | <i>Egfr</i>  | Epidermal growth factor receptor  | -1.67 | # |
| C01                    | Mm.389224 | NM_010135 | <i>Enah</i>  | Enabled homolog (Drosophila)      | -1.46 |   |
| C02                    | Mm.277812 | NM_009510 | <i>Ezr</i>   | Ezrin                             | -1.44 |   |
| C03                    | Mm.41816  | NM_007986 | <i>Fap</i>   | Fibroblast activation protein     | -3.10 | # |

|     |           |           |              |                                                 |       |   |
|-----|-----------|-----------|--------------|-------------------------------------------------|-------|---|
| C04 | Mm.473689 | NM_008006 | <i>Fgf2</i>  | Fibroblast growth factor 2                      | -2.16 | # |
| C05 | Mm.267078 | NM_010427 | <i>Hgf</i>   | Hepatocyte growth factor                        | -2.27 | # |
| C06 | Mm.268521 | NM_010512 | <i>Igf1</i>  | Insulin-like growth factor 1                    | -2.29 | # |
| C07 | Mm.275742 | NM_010513 | <i>Igf1r</i> | Insulin-like growth factor I receptor           | -1.59 |   |
| C08 | Mm.274846 | NM_010562 | <i>Ilk</i>   | Integrin linked kinase                          | -1.19 |   |
| C09 | Mm.31903  | NM_010576 | <i>Itga4</i> | Integrin alpha 4                                | -1.58 | # |
| C10 | Mm.263396 | NM_010578 | <i>Itgb1</i> | Integrin beta 1 (fibronectin receptor beta)     | -1.69 |   |
| C11 | Mm.1137   | NM_008404 | <i>Itgb2</i> | Integrin beta 2                                 | -2.49 | # |
| C12 | Mm.87150  | NM_016780 | <i>Itgb3</i> | Integrin beta 3                                 | -2.38 | # |
| D01 | Mm.15409  | NM_010717 | <i>Limk1</i> | LIM-domain containing, protein kinase           | -1.97 | # |
| D02 | Mm.196581 | NM_011949 | <i>Mapk1</i> | Mitogen-activated protein kinase 1              | -2.06 |   |
| D03 | Mm.86844  | NM_008591 | <i>Met</i>   | Met proto-oncogene                              | -1.96 | # |
| D04 | Mm.486486 | NM_008608 | <i>Mmp14</i> | Matrix metalloproteinase 14 (membrane-inserted) | -1.29 |   |
| D05 | Mm.29564  | NM_008610 | <i>Mmp2</i>  | Matrix metalloproteinase 2                      | -1.63 | # |
| D06 | Mm.4406   | NM_013599 | <i>Mmp9</i>  | Matrix                                          | -1.35 | # |

|                          |           |           |               |                                        |         |
|--------------------------|-----------|-----------|---------------|----------------------------------------|---------|
| metallopeptidase 9       |           |           |               |                                        |         |
| D07                      | Mm.138876 | NM_010833 | <i>Msn</i>    | Moesin                                 | -1.42   |
| Myosin, heavy            |           |           |               |                                        |         |
| D08                      | Mm.218233 | NM_175260 | <i>Myh10</i>  | polypeptide 10, non-muscle             | -1.39   |
| Myosin, heavy            |           |           |               |                                        |         |
| D09                      | Mm.29677  | NM_022410 | <i>Myh9</i>   | polypeptide 9, non-muscle              | -1.53   |
| Myosin, light            |           |           |               |                                        |         |
| D10                      | Mm.33360  | NM_139300 | <i>Mylk</i>   | polypeptide kinase                     | -1.90 # |
| P21 protein              |           |           |               |                                        |         |
| D11                      | Mm.260227 | NM_011035 | <i>Pak1</i>   | (Cdc42/Rac)-activated kinase 1         | -1.58   |
| P21 protein              |           |           |               |                                        |         |
| D12                      | Mm.21876  | NM_027470 | <i>Pak4</i>   | (Cdc42/Rac)-activated kinase 4         | -1.69   |
| E01                      | Mm.2647   | NM_011072 | <i>Pfn1</i>   | Profilin 1                             | -2.96   |
| Phosphatidylinositol     |           |           |               |                                        |         |
| E02                      | Mm.260521 | NM_008839 | <i>Pik3ca</i> | 3-kinase, catalytic, alpha polypeptide | -1.76   |
| Plasminogen              |           |           |               |                                        |         |
| E03                      | Mm.1359   | NM_011113 | <i>Plaur</i>  | activator, urokinase receptor          | -1.66 # |
| Phospholipase C, gamma 1 |           |           |               |                                        |         |
| E04                      | Mm.44463  | NM_021280 | <i>Plcg1</i>  |                                        | -1.54   |
| E05                      | Mm.212039 | NM_008875 | <i>Pld1</i>   | Phospholipase D1                       | -1.44 # |
| Protein kinase C, alpha  |           |           |               |                                        |         |
| E06                      | Mm.222178 | NM_011101 | <i>Prkca</i>  |                                        | -1.50   |
| E07                      | Mm.245395 | NM_008960 | <i>Pten</i>   | Phosphatase and                        | 1.82    |

|     |           |           |                 |                                                              |       |   |
|-----|-----------|-----------|-----------------|--------------------------------------------------------------|-------|---|
|     |           |           |                 | tensin homolog                                               |       |   |
| E08 | Mm.254494 | NM_007982 | <i>Ptk2</i>     | PTK2 protein<br>tyrosine kinase 2                            | -1.31 |   |
| E09 | Mm.21613  | NM_172498 | <i>Ptk2b</i>    | PTK2 protein<br>tyrosine kinase 2 beta                       | -1.93 | # |
| E10 | Mm.277916 | NM_011201 | <i>Ptpn1</i>    | Protein tyrosine<br>phosphatase, non-<br>receptor type 1     | -1.80 |   |
| E11 | Mm.18714  | NM_011223 | <i>Pxn</i>      | Paxillin                                                     | -1.37 | # |
| E12 | Mm.469963 | NM_009007 | <i>Rac1</i>     | RAS-related C3<br>botulinum substrate 1                      | -1.55 |   |
| F01 | Mm.1972   | NM_009008 | <i>Rac2</i>     | RAS-related C3<br>botulinum substrate 2                      | -1.92 | # |
| F02 | Mm.259653 | NM_145452 | <i>Rasa1</i>    | RAS p21 protein<br>activator 1                               | -1.92 |   |
| F03 | Mm.472057 | NM_009041 | <i>Rdx</i>      | Radixin                                                      | -1.50 |   |
| F04 | Mm.406156 | NM_145383 | <i>Rho</i>      | Rhodopsin                                                    | -1.87 | # |
| F05 | Mm.318359 | NM_016802 | <i>Rhoa</i>     | Ras homolog gene<br>family, member A                         | -1.66 |   |
| F06 | Mm.687    | NM_007483 | <i>Rhob</i>     | Ras homolog gene<br>family, member B                         | 1.33  |   |
| F07 | Mm.262    | NM_007484 | <i>Rhoc</i>     | Ras homolog gene<br>family, member C                         | -1.65 |   |
| F08 | Mm.46497  | NM_028810 | <i>Rnd3</i>     | Rho family GTPase 3                                          | -1.82 |   |
| F09 | Mm.6710   | NM_009071 | <i>Rock1</i>    | Rho-associated<br>coiled-coil containing<br>protein kinase 1 | -2.04 |   |
| F10 | Mm.127560 | NM_008018 | <i>Sh3pxd2a</i> | SH3 and PX domains<br>2A                                     | -1.63 | # |



|     |           |           |              |                                                          |       |          |
|-----|-----------|-----------|--------------|----------------------------------------------------------|-------|----------|
| F11 | Mm.22845  | NM_009271 | <i>Src</i>   | Rous sarcoma<br>oncogene                                 | -1.79 | #        |
| F12 | Mm.249934 | NM_011486 | <i>Stat3</i> | Signal transducer and<br>activator of<br>transcription 3 | -1.71 |          |
| G01 | Mm.136791 | NM_153153 | <i>Svil</i>  | Supervillin                                              | -1.78 |          |
| G02 | Mm.248380 | NM_011577 | <i>Tgfb1</i> | Transforming growth<br>factor, beta 1                    | -2.51 | #        |
| G03 | Mm.206505 | NM_011594 | <i>Timp2</i> | Tissue inhibitor of<br>metalloproteinase 2               | -2.19 |          |
| G04 | Mm.208601 | NM_011602 | <i>Tln1</i>  | Talin 1                                                  | -2.08 |          |
| G05 | Mm.9684   | NM_009499 | <i>Vasp</i>  | Vasodilator-<br>stimulated<br>phosphoprotein             | -1.87 | #        |
| G06 | Mm.279361 | NM_009502 | <i>Vcl</i>   | Vinculin                                                 | -2.15 |          |
| G07 | Mm.282184 | NM_009505 | <i>Vegfa</i> | Vascular endothelial<br>growth factor A                  | -1.73 |          |
| G08 | Mm.268000 | NM_011701 | <i>Vim</i>   | Vimentin                                                 | -1.98 |          |
| G09 | Mm.41353  | NM_031877 | <i>Wasf1</i> | WASP family 1                                            | -1.59 |          |
| G10 | Mm.23566  | NM_153423 | <i>Wasf2</i> | WAS protein family,<br>member 2                          | -1.76 | #        |
| G11 | Mm.1574   | NM_028459 | <i>Wasl</i>  | Wiskott-Aldrich<br>syndrome-like<br>(human)              | -1.74 |          |
| G12 | Mm.223504 | NM_153138 | <i>Wipfl</i> | WAS/WASL<br>interacting protein<br>family, member 1      | -2.14 | #        |
| H03 | Mm.304088 | NM_008084 | <i>Gapdh</i> | Glyceraldehyde-3-                                        | 1.44  | internal |

|     |         |           |                 | phosphate                                                       | control                      |
|-----|---------|-----------|-----------------|-----------------------------------------------------------------|------------------------------|
|     |         |           |                 | dehydrogenase                                                   |                              |
| H05 | Mm.2180 | NM_008302 | <i>Hsp90ab1</i> | Heat shock protein 90<br>alpha (cytosolic),<br>class B member 1 | -1.44<br>Internal<br>control |

Gene expression was analyzed by Qiagen online software (<https://www.qiagen.com/cn/shop/genes-and-pathways/data-analysis-center-overview-page/>) using Gapdh and Hsp90ab1 as internal control. Up-regulated genes were shown as positive values and down-regulated genes were shown as negative values. # indicated genes that had low basal expression level (Ct value>30 in control samples). The most up-regulated gene (*Arhgef7*) was colored in RED, and the most down-regulated genes (*Actn1*, *Arf6*, *Fap*, *Pfn1*) were colored in GREEN.

**Table S2 Sequences of primers in this study**

| Primers          | Sequence 5' to 3'                           | Notes                   |
|------------------|---------------------------------------------|-------------------------|
| NEX Cre 1:       | CCGCATAACCAGTGAAACAG                        | (Goebbels et al., 2006) |
| NEX Cre 2:       | AGAATGTGGAGTAGGGTGAC                        | Pair with NEX Cre 1     |
| NEX Cre 3:       | GAGTCCTGGCAGTCTTTTTC                        | Pair with NEX Cre 1     |
| HuR flox F:      | CTCTCCAGGCAGATGAGCA                         | (Ghosh et al., 2009)    |
| HuR flox R:      | TAGGCTCTGGGATGAAACCT                        |                         |
| Ai27D Wild F:    | AAG GGA GCT GCA GTG GAG TA                  | (Linda et al., 2012)    |
| Ai27D Wild R:    | CCGAAAATCTGTGGGAAGTC                        |                         |
| Ai27D Mutant F:  | CTGTTTCCTGTACGGCATGG                        | (Linda et al., 2012)    |
| Ai27D Mutant R:  | GGCATTAAGCAGCGTATCC                         |                         |
| Nestin-Cre 1:    | GCCTTATTGTGGAAGGAC                          | (Giusti et al., 2014)   |
| Nestin-Cre 2:    | TTGCTAAAGCGCTACATAGGA                       | Pair with Nestin-Cre 1  |
| Nestin-Cre 3     | CCTTCCTGAAGCAGTAGAGCA                       | Pair with Nestin-Cre 1  |
| 1-81 3'UTR: F:   | CCGCTCGAGCCTCATCTGTCCCTTCCCC<br>CCACCG      | Pfn1 cloning            |
| 1-81 3'UTR: R:   | TTTTCCTTTTGCGGCCGCAAAAAATAAT<br>GGTATGTGTG  | Pfn1 cloning            |
| 82-290 3'UTR: F: | CCGCTCGAGGGGCCATTACCCCATTTTC                | Pfn1 cloning            |
| 82-290 3'UTR: R: | TTTTCCTTTTGCGGCCGCTTTTTTTTTTTT<br>TTTTGTTAG | Pfn1 cloning            |
| 1-194 3'UTR: R:  | TTTTCCTTTTGCGGCCGCTTTTCCAAACACACACAG<br>GA  | Pfn1 cloning            |
| HuR F:           | TTCTGGTGTCAATGTCCCCG                        | qPCR                    |
| HuR R:           | CAAAGGGGCCAAACATCTGC                        | qPCR                    |
| GAPDH F:         | GAGAGACCCTCACTGCTG                          | qPCR                    |
| GAPDH R:         | GATGGTACATGACAAGGTGC                        | qPCR                    |
| Profilin1 F:     | GTGGAACGCCTACATCGACA                        | qPCR                    |

|              |                                    |                   |
|--------------|------------------------------------|-------------------|
| Profilin1 R: | TTGACCGGTCTTTGCCTACC               | qPCR              |
| Actn1 F:     | ACATGCAGCCTGAAGAGGAC               | qPCR              |
| Actn1 R:     | TGAGATGACCTCCAGGAGCA               | qPCR              |
| Arf6 F:      | ATCTTCGCCAACAAGCAGGA               | qPCR              |
| Arf6 R:      | AGGTTAACCATGTGAGCCCC               | qPCR              |
| Actn3 F:     | GAGCTCGACTACCATGAGGC               | qPCR              |
| Actn3 R:     | GCCAGTTATTGAAGGGGGCT               | qPCR              |
| Rhob F:      | ACTATGTGGCGGACATCGAG               | qPCR              |
| Rhob R:      | AGAAGTGCTTTACCTCGGGC               | qPCR              |
| Pten F:      | TCCTGCAGAAAGACTTGAAGGT             | qPCR              |
| Pten R:      | GCTGTGGTGGGTATGGTCT                | qPCR              |
| Fap F:       | GGCTGGGGCTAAGAATCCG                | qPCR              |
| Fap R:       | GCATACTCGTTCACTGGACAC              | qPCR              |
| Arhgef7 F:   | CATAATCACGTCTTGGCTGATGA            | qPCR              |
| Arhgef7 R    | CAGCAGCTCTTACGGGATGC               | qPCR              |
| pfn1-F       | CCTCATCTGTCCCTTCCCCCACC            | RNA binding assay |
| pfn1-R       | GTTAGTAGAATCTTTTTTTATTCAGAAA<br>AA | RNA binding assay |

## References

- Ghosh, M., Aguila, H. L., Michaud, J., Ai, Y., Wu, M.-T., Hemmes, A., Ristimäki, A., Guo, C., Furneaux, H. and Hla, T. (2009). Essential role of the RNA-binding protein HuR in progenitor cell survival in mice. *J. Clin. Investig.* **119**, 3530-3543. doi:10.1172/JCI38263
- Giusti, S. A., Vercelli, C. A., Vogl, A. M., Kolarz, A. W., Pino, N. S., Deussing, J. M. and Refojo, D. (2014). Behavioral phenotyping of Nestin-Cre mice: implications for genetic mouse models of psychiatric disorders. *J. Psychiatr. Res.* **55**, 87-95. doi:10.1016/j.jpsychires.2014.04.002
- Goebbels, S., Bormuth, I., Bode, U., Hermanson, O., Schwab, M. H. and Nave, K.-A. (2006). Genetic targeting of principal neurons in neocortex and hippocampus of NEX-Cre mice. *Genesis* **44**, 611-621. doi:10.1002/dvg.20256
- Linda, M., Tianyi, M., Henner, K., Jia-Min, Z., Antal, B., Shigeyoshi, F., Hsu, Y. W. A., Garcia, A. J., Xuan, G. and Sebastien, Z. (2012). A toolbox of Cre-dependent optogenetic transgenic mice for light-induced activation and silencing. *Nat. Neurosci.* **15**, 793. doi:10.1038/nn.3078
